# Supplementary material for: User-composable Electronic Health Record Improves Efficiency of Clinician Data Viewing for Patient Case Appraisal: A Mixed-Methods Study
Source: PubMed Central journal article supplement — EGEMS (Wash DC). 2016 May 2;4(1):1176. doi: 10.13063/2327-9214.1176 (PMC4862763; doi:10.13063/2327-9214.1176), 2016-05-02
Supplement: egems1176_supplementary_0.pdf [file egems1176_supplementary_0.pdf]

Appendix Figure 1. **Example comparative interaction for a subset of a case appraisal task.** In each system, the user views a note and several laboratory result panels. See also Figure 2.

### Conventional system

1a. The user clicks on the side menu and views the latest note

|                     |                                         |
|---------------------|-----------------------------------------|
| Menu                | Patient, Fake MRN: 222-2222 DOB: 5/5/55 |
| Demographics        | Primary clinic note                     |
| Notes               |                                         |
| Primary clinic note |                                         |
| Laboratory Results  |                                         |
| Creatinine, urine   |                                         |
| BMP                 |                                         |
| HbA1c               |                                         |
| Urinalysis          |                                         |
| BMP2                |                                         |

2a. The user clicks on the labs menu and views the creatinine.

|                     |                                         |
|---------------------|-----------------------------------------|
| Menu                | Patient, Fake MRN: 222-2222 DOB: 5/5/55 |
| Demographics        | Creatinine, urine                       |
| Notes               |                                         |
| Primary clinic note |                                         |
| Laboratory Results  |                                         |
| Creatinine, urine   |                                         |
| BMP                 |                                         |
| HbA1c               |                                         |
| Urinalysis          |                                         |
| BMP2                |                                         |

3a. The user clicks on the labs menu and views the Basic Metabolic Panel.

|                     |                                         |
|---------------------|-----------------------------------------|
| Menu                | Patient, Fake MRN: 222-2222 DOB: 5/5/55 |
| Demographics        | Basic Metabolic Panel                   |
| Notes               |                                         |
| Primary clinic note |                                         |
| Laboratory Results  |                                         |
| Creatinine, urine   |                                         |
| BMP                 |                                         |
| HbA1c               |                                         |
| Urinalysis          |                                         |
| BMP2                |                                         |

4a. The user clicks on the labs menu and views the HbA1c.

|                     |                                         |
|---------------------|-----------------------------------------|
| Menu                | Patient, Fake MRN: 222-2222 DOB: 5/5/55 |
| Demographics        | HbA1c                                   |
| Notes               |                                         |
| Primary clinic note |                                         |
| Laboratory Results  |                                         |
| Creatinine, urine   |                                         |
| BMP                 |                                         |
| HbA1c               |                                         |
| Urinalysis          |                                         |
| BMP2                |                                         |

### MedWISE

1b. The user clicks on the side menu and views the latest note

|                     |                                         |
|---------------------|-----------------------------------------|
| Menu                | Patient, Fake MRN: 222-2222 DOB: 5/5/55 |
| Demographics        | Primary clinic note                     |
| Notes               |                                         |
| Primary clinic note |                                         |
| Laboratory Results  |                                         |
| Creatinine, urine   |                                         |
| BMP                 |                                         |
| HbA1c               |                                         |
| Urinalysis          |                                         |
| BMP2                |                                         |

2b. The user clicks on the labs menu and views the creatinine, but the note remains on screen, one can compare note and lab.

|                     |                                         |                   |
|---------------------|-----------------------------------------|-------------------|
| Menu                | Patient, Fake MRN: 222-2222 DOB: 5/5/55 |                   |
| Demographics        | Primary clinic note                     | Creatinine, urine |
| Notes               |                                         |                   |
| Primary clinic note |                                         |                   |
| Laboratory Results  |                                         |                   |
| Creatinine, urine   |                                         |                   |
| BMP                 |                                         |                   |
| HbA1c               |                                         |                   |
| Urinalysis          |                                         |                   |
| BMP2                |                                         |                   |

3b. The user clicks on the labs menu and views the Basic Metabolic Panel. The other items remain on screen.

|                     |                                         |                   |
|---------------------|-----------------------------------------|-------------------|
| Menu                | Patient, Fake MRN: 222-2222 DOB: 5/5/55 |                   |
| Demographics        | Primary clinic note                     | Creatinine, urine |
| Notes               |                                         |                   |
| Primary clinic note |                                         |                   |
| Laboratory Results  |                                         |                   |
| Creatinine, urine   |                                         |                   |
| BMP                 |                                         |                   |
| HbA1c               |                                         |                   |
| Urinalysis          |                                         |                   |
| BMP2                |                                         |                   |
|                     | Basic Metabolic Panel                   |                   |

4b. The user clicks on the labs menu and views the HbA1c. The other items remain on screen.

|                     |                                         |                   |
|---------------------|-----------------------------------------|-------------------|
| Menu                | Patient, Fake MRN: 222-2222 DOB: 5/5/55 |                   |
| Demographics        | Primary clinic note                     | Creatinine, urine |
| Notes               |                                         |                   |
| Primary clinic note |                                         |                   |
| Laboratory Results  |                                         |                   |
| Creatinine, urine   |                                         |                   |
| BMP                 |                                         |                   |
| HbA1c               |                                         |                   |
| Urinalysis          |                                         |                   |
| BMP2                |                                         |                   |
|                     | Basic Metabolic Panel                   |                   |
|                     | HbA1c                                   |                   |
